# Supplementary material for: Magnetic PEGylated Pt3Co nanoparticles as a novel MR contrast agent: in vivo MR imaging and long-term toxicity study
Source: Royal Society of Chemistry journal article supplement (doi:10.1039/c3nr04212j), 2013-01-01
Supplement: c3nr04212j.pdf [file c3nr04212j.pdf]

## Supporting Information

### **Magnetic Pt<sub>3</sub>Co Nanoparticles as a Novel MR Contrast Agent: in vivo MR**

#### **Imaging and Long-term Toxicity Study**

Shengnan Yin<sup>1</sup>, Liang Cheng<sup>2\*</sup>, Zhiwei Li<sup>2</sup>, Chao Wang<sup>2</sup>, Yumeng Liu<sup>1</sup>, Qian Chen<sup>2</sup>, Hua Gong<sup>2</sup>,  
Liang Guo<sup>1\*</sup>, Yonggang Li<sup>1\*</sup>, Zhuang Liu<sup>2\*</sup>

<sup>1</sup>Department of Radiology, the First Affiliated Hospital of Soochow University, Suzhou, Jiangsu  
215006 (China)

<sup>2</sup>Jiangsu Key Laboratory for Carbon-Based Functional Materials & Devices, Institute of  
Functional Nano & Soft Materials (FUNSOM) Soochow University, Suzhou, Jiangsu 215123  
(China)

E-mail: lcheng2@suda.edu.cn, liyonggang224@163.com, ilguoliang@sohu.com,  
zliu@suda.edu.cn

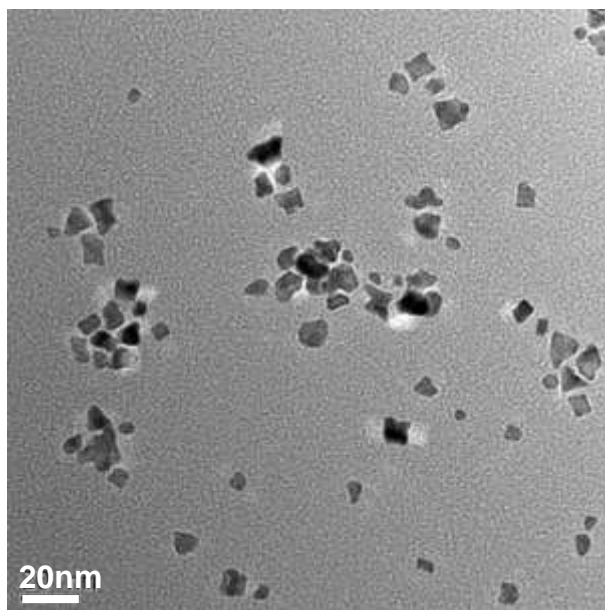

**Figure S1.** A TEM image of Pt<sub>3</sub>Co-PEG. Some small clusters of ultra-small nanoparticles formed during PEG coating.

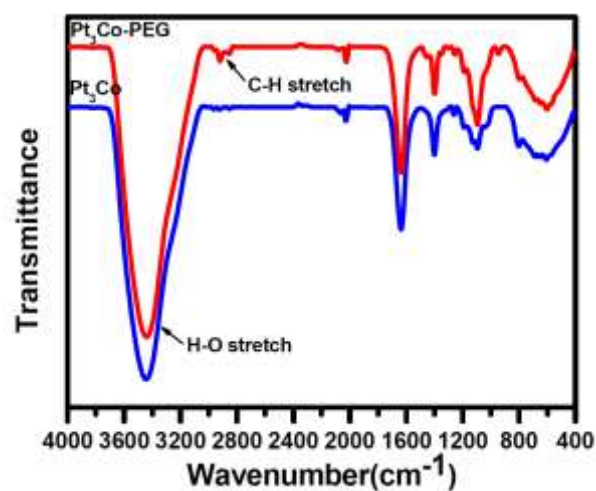

**Figure S2.** FT-IR spectra of Pt<sub>3</sub>Co and Pt<sub>3</sub>Co-PEG nanoparticles. The strong IR absorbance bands around 3000cm<sup>-1</sup> from the Pt<sub>3</sub>Co-PEG sample could be attributed to C-H vibrations in the PEG coating.

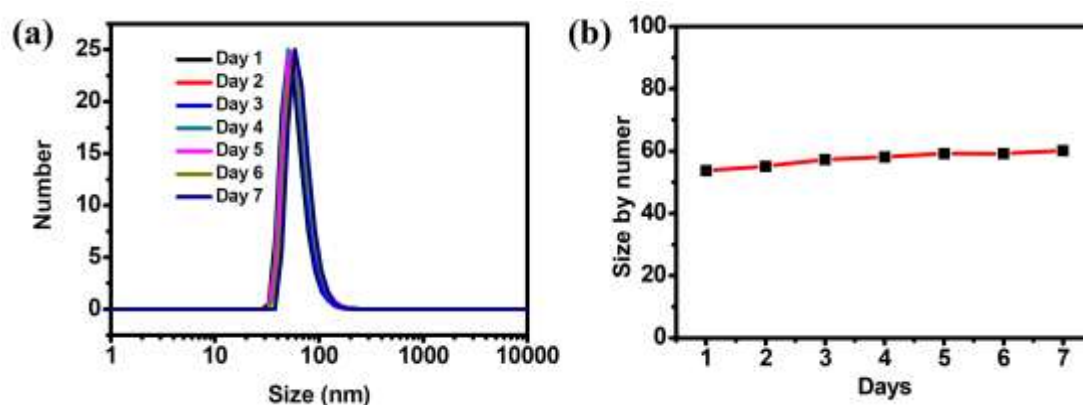

**Figure S3.** (a) The size distribution of Pt<sub>3</sub>Co-PEG nanoparticles measured by DLS at different days. (b) The size of Pt<sub>3</sub>Co-PEG by number at different days.
